# Supplementary material for: pH-Induced processes in wire-like multichromophoric homo- and heterotrimetallic complexes of Fe(ii), Ru(ii), and Os(ii)
Source: Royal Society of Chemistry journal article supplement (doi:10.1039/c5dt00708a), 2015-01-01
Supplement: c5dt00708a1.pdf [file c5dt00708a1.pdf]

## Electronic Supplementary Information

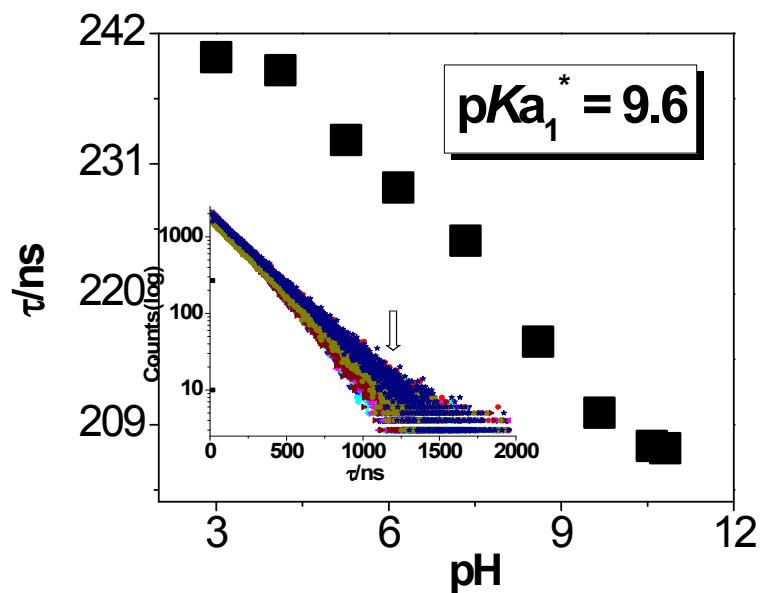

**Fig. S1** Change of the excited state lifetimes of **1** with variation of pH in acetonitrile-water (3:2 v/v). Inset shows the decay profiles of **1** as a function of pH of the solution. Excited state  $pK^*$  values are also given in figure.

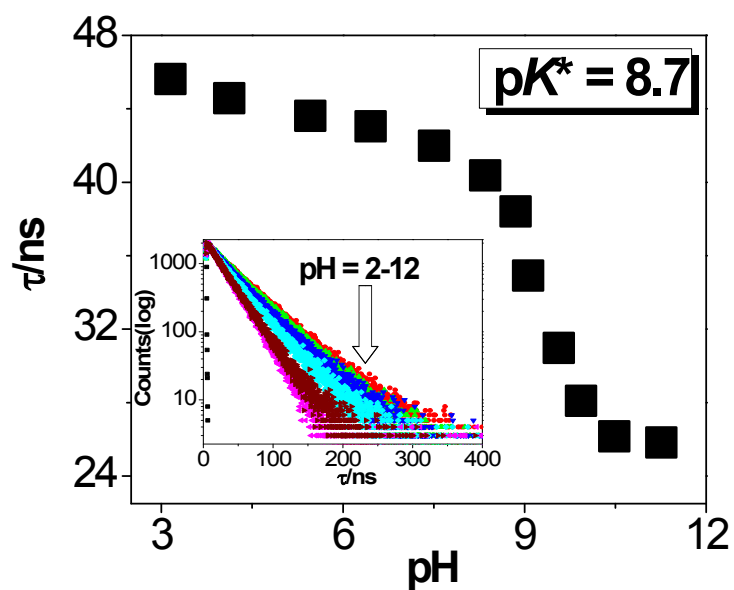

**Fig. S2** Change of the excited state lifetimes of **2** with variation of pH in acetonitrile-water (3:2 v/v). Inset shows the decay profiles of **2** as a function of pH of the solution. Excited state  $pK^*$  values are also given in figure.

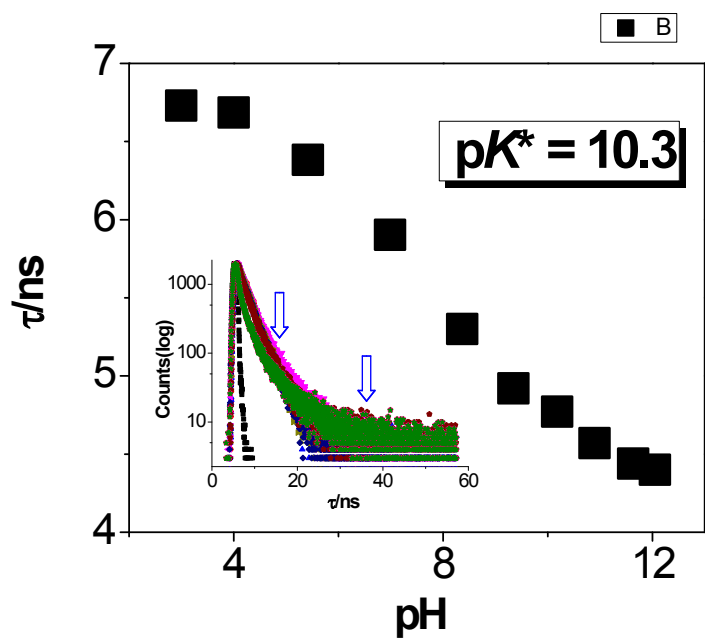

**Fig. S3** Change of the excited state lifetimes of **3** with variation of pH in acetonitrile-water (3:2 v/v). Inset shows the decay profiles of **3** as a function of pH of the solution. Excited state  $pK^*$  values are also given in figure.

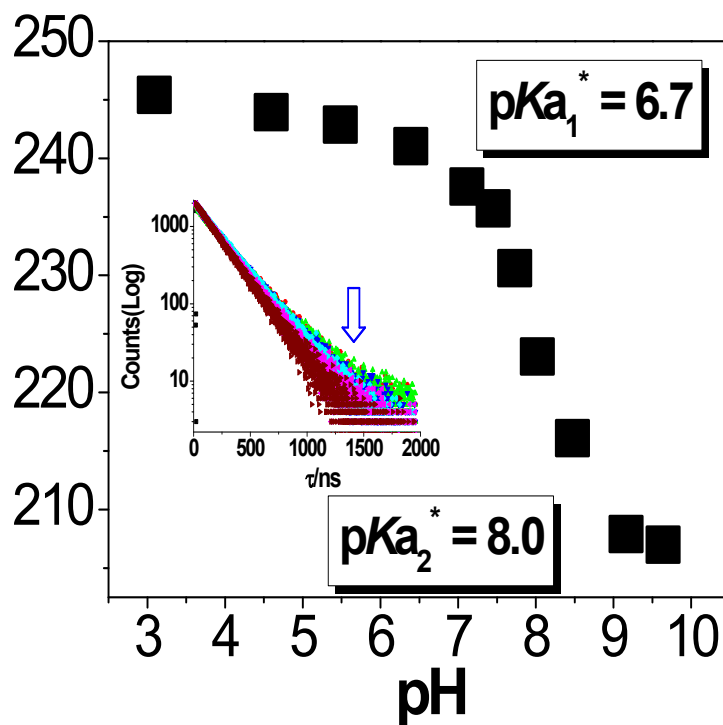

**Fig. S4** Change of the excited state lifetimes of **RuFeRu (4)** with variation of pH in acetonitrile-water (3:2 v/v). Inset shows the decay profiles of **3** as a function of pH of the solution. Excited state  $pK^*$  values are also given in figure.

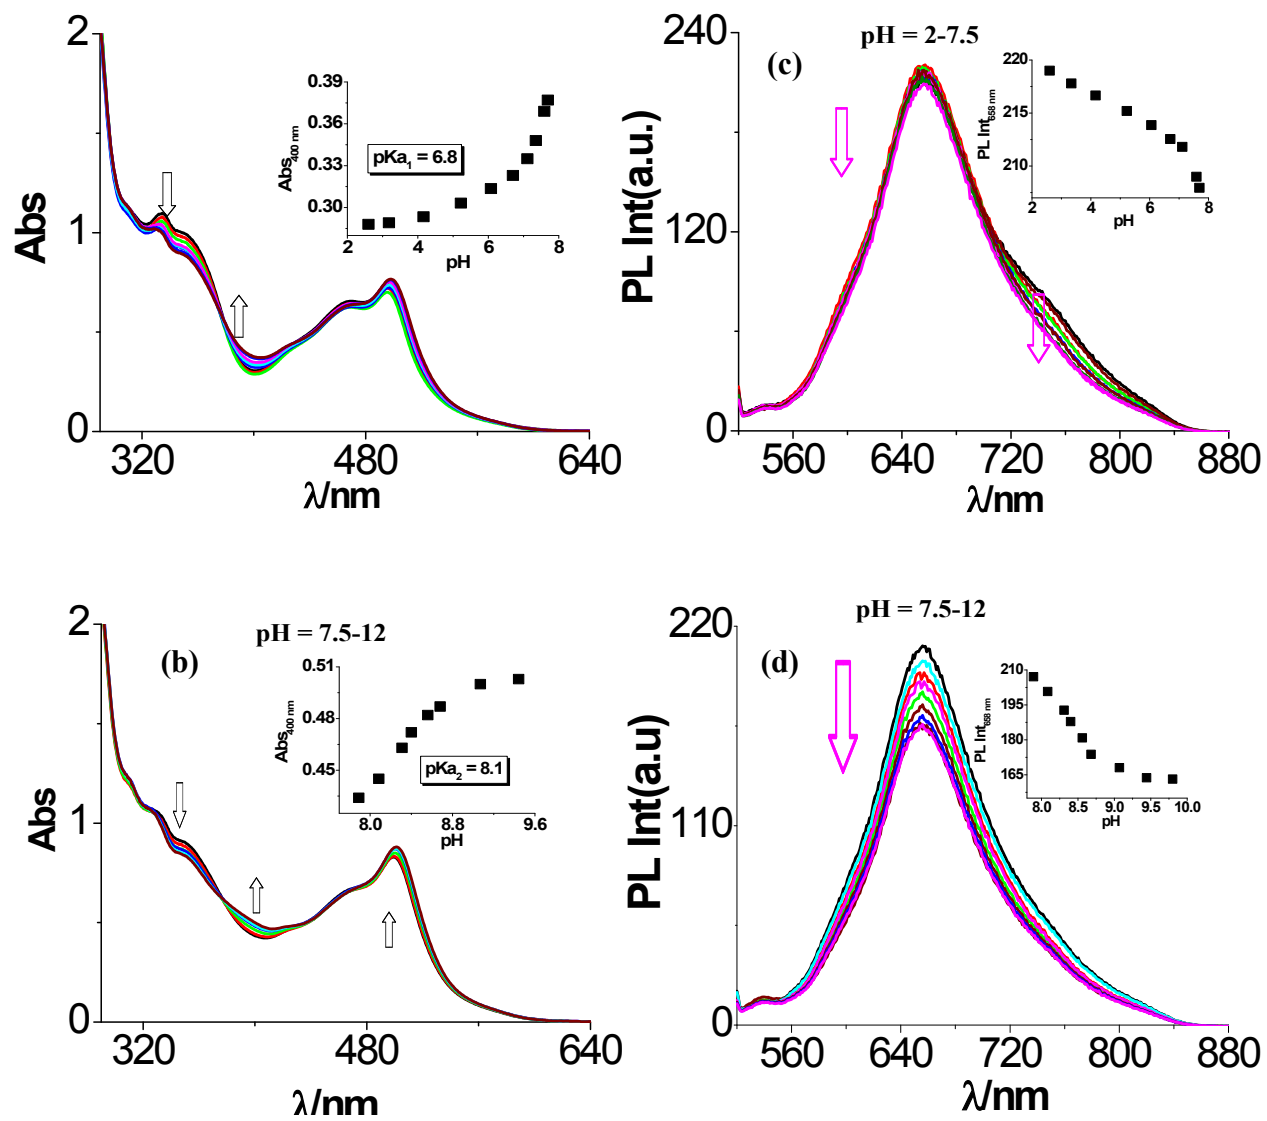

**Fig. S5** Changes in the absorption (a-b) and photoluminescence spectra (c-d) of **RuRuRu (5)** with variation of pH in acetonitrile-water (3:2 v/v). The insets show the change of absorbance (a- b) and luminescence intensity (c-d) with the pH of the solution.

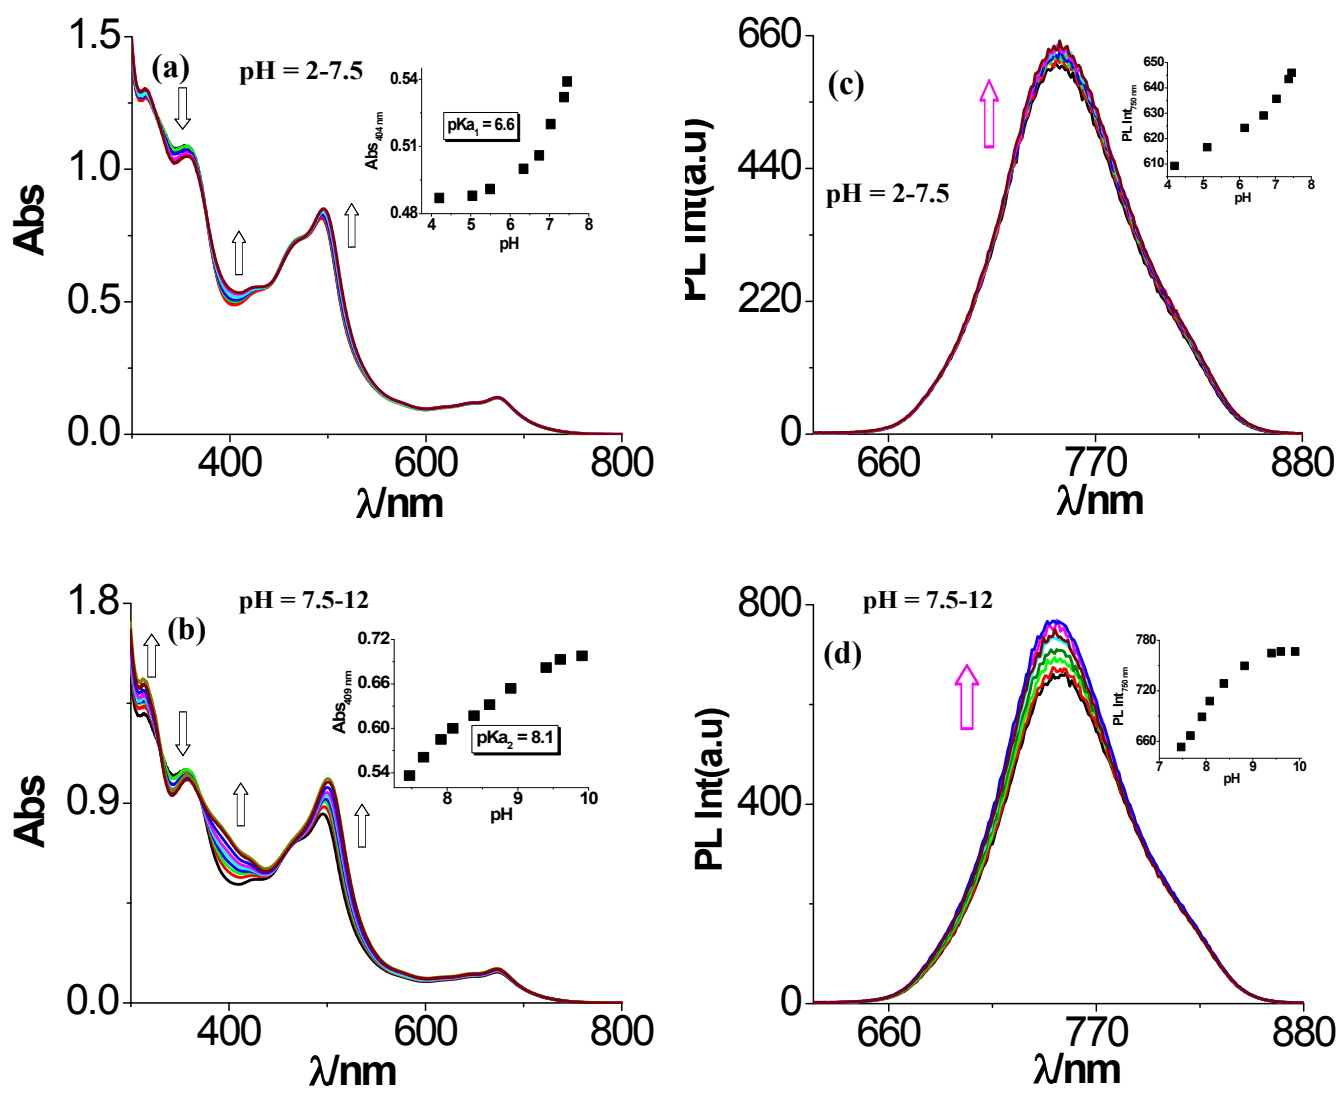

**Fig. S6** Changes in the absorption (a-b) and photoluminescence spectra (c-d) of **RuOsRu (6)** with variation of pH in acetonitrile-water (3:2 v/v). The insets show the change of absorbance (a-b) and luminescence intensity (c-d) with the pH of the solution.

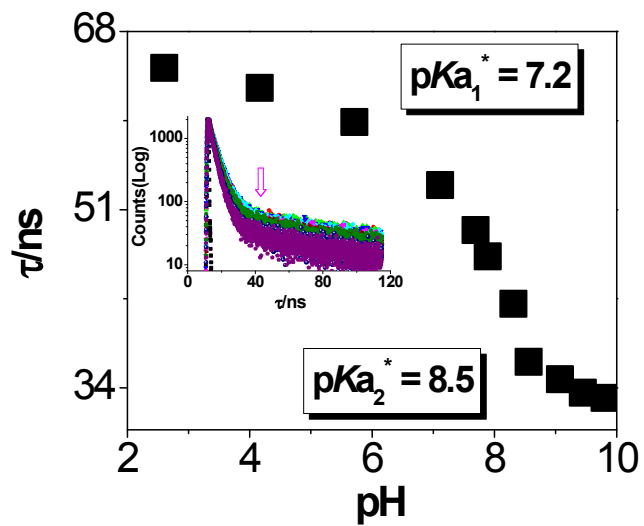

**Fig. S7** Change of the excited state lifetimes of **RuRuRu (5)** with variation of pH in acetonitrile-water (3:2 v/v). Inset shows the decay profiles of **5** as a function of pH of the solution. Excited state  $pK^*$  values are also given in figure.

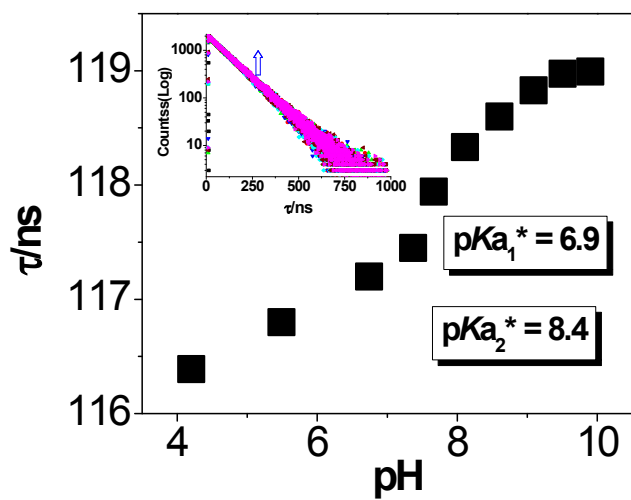

**Fig. S8** Change of the excited state lifetimes of **RuOsRu (6)** with variation of pH in acetonitrile-water (3:2 v/v). Inset shows the decay profiles of **5** as a function of pH of the solution. Excited state  $pK^*$  values are also given in figure.



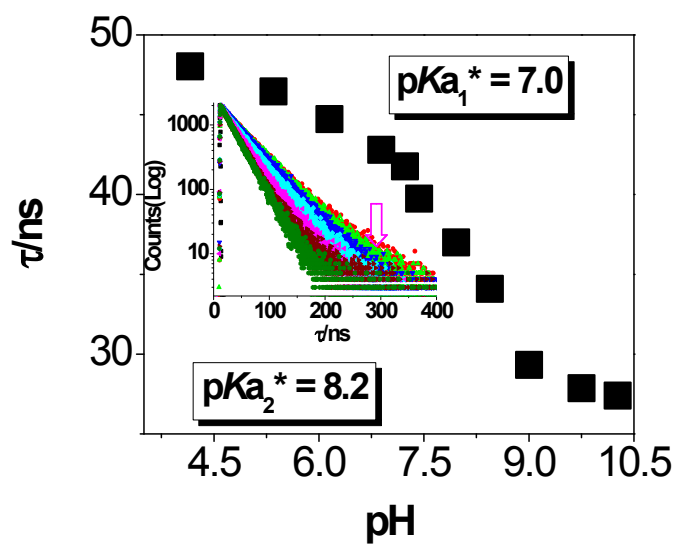

**Fig. S9** Change of the excited state lifetimes of OsRuOs (**8**) with variation of pH in acetonitrile-water (3:2 v/v). Inset shows the decay profiles of **8** as a function of pH of the solution. Excited state  $pK^*$  values are also given in figure.

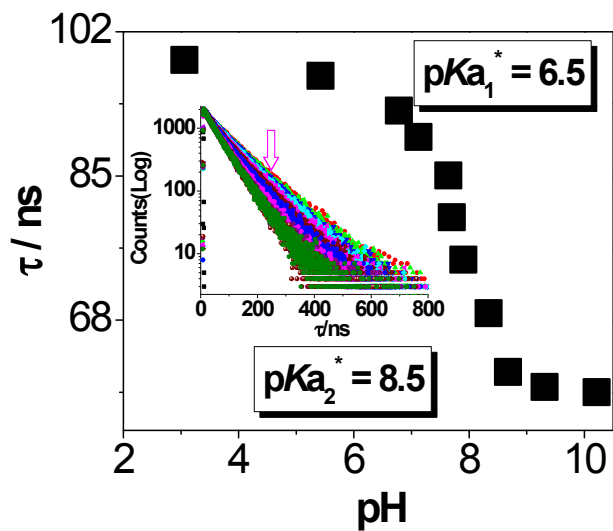

**Fig. S10** Change of the excited state lifetimes of **OsOsOs** (**9**) with variation of pH in acetonitrile-water (3:2 v/v). Inset shows the decay profiles of **9** as a function of pH of the solution. Excited state  $pK^*$  values are also given in figure.

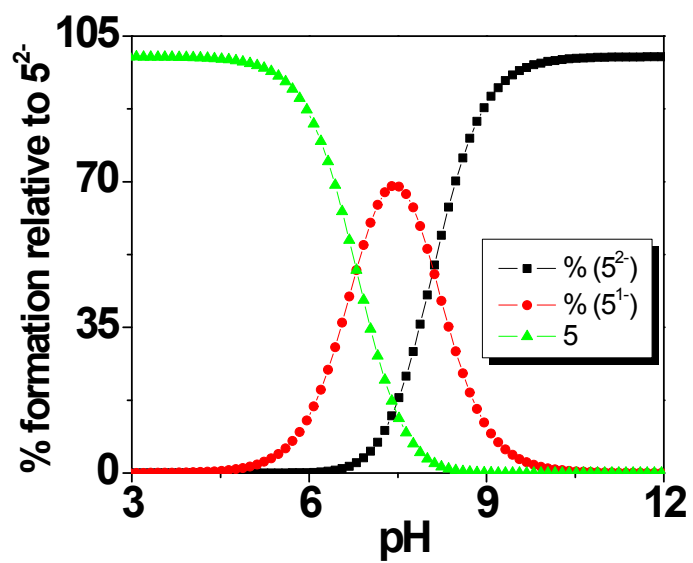

**Fig. S11** The distribution of the three species for the complex **5** in the pH range of 2-12.

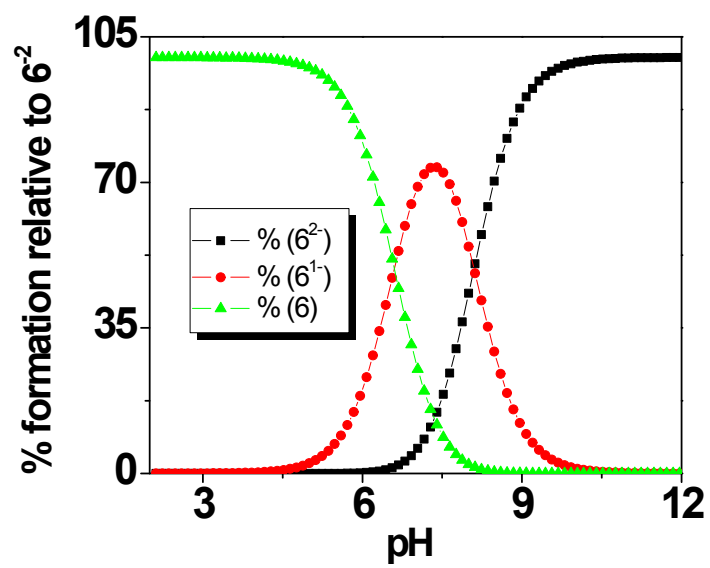

**Fig. S12** The distribution of the three species for the complex **6** in the pH range of 2-12.

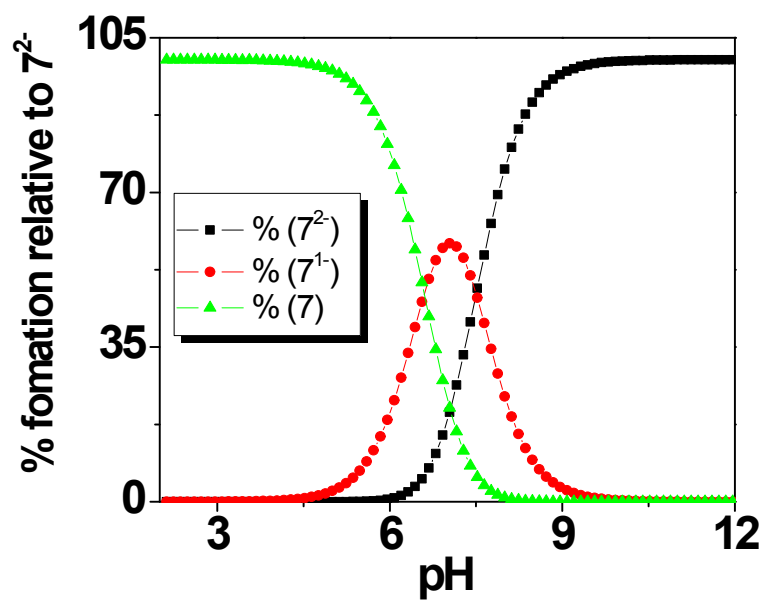

**Fig. S13** The distribution of the three species for the complex **7** in the pH range of 2-12.

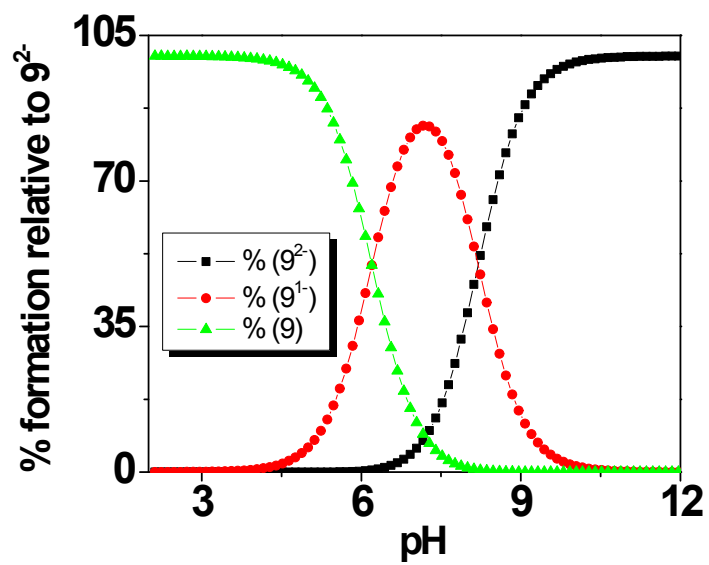

Fig. S14 The distribution of the three species for the complex **9** in the pH range of 2-12.
